# Supplementary material for: The Use of Respiratory Effort Improves an ECG-Based Deep Learning Algorithm to Assess Sleep-Disordered Breathing
Source: MDPI journal article supplement (doi:10.3390/diagnostics13132146), 2023-06-23
Supplement: s1 [file s1]

## Supplementary Materials:

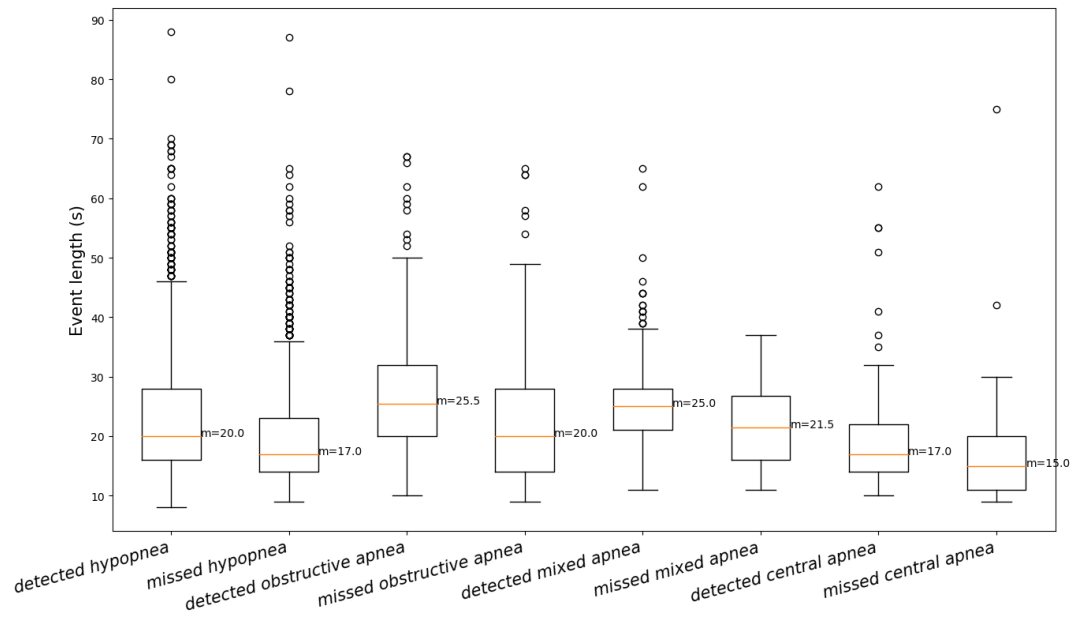

**Figure S1.** Boxplot illustrating the event length distribution for detected and missed SDB events of all types in the testing set, utilizing RR and EDR as input (m stands for median).

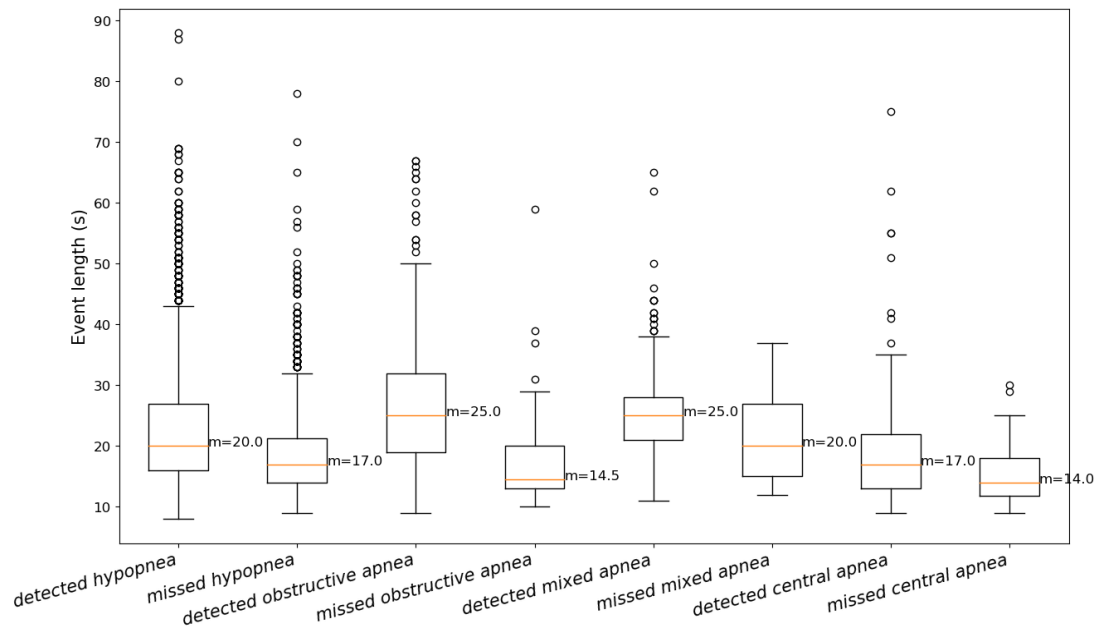

**Figure S2.** Boxplot illustrating the event length distribution for detected and missed SDB events of all types in the testing set, utilizing RR and RE as input (m stands for median).

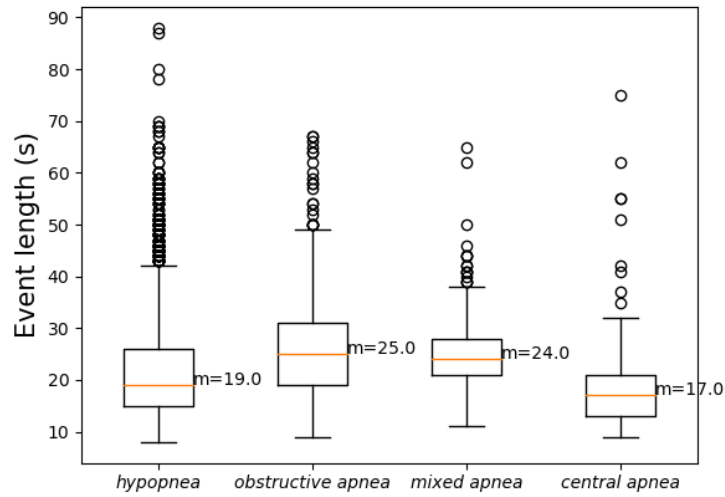

**Figure S3.** Boxplot illustrating the event length distribution of various types of SDB events in the testing set.

**Table S1.** Sensitivity of SDB event detection in different sleep stages with RR and RE as inputs

| Sleep stage                   | N1    | N2    | N3    | REM   |
|-------------------------------|-------|-------|-------|-------|
| Number of SDB events          | 932   | 2291  | 125   | 676   |
| Number of detected SDB events | 731   | 1769  | 56    | 512   |
| Sensitivity                   | 0.784 | 0.772 | 0.448 | 0.757 |

*Note: SDB events having overlapped periods with different stages are not included to avoid confusion.*

**Table S2.** Sensitivity of SDB event detection in different body positions with RR and RE as inputs

| Body position                 | right | Supine | Left  | Prone |
|-------------------------------|-------|--------|-------|-------|
| Number of SDB events          | 1769  | 2754   | 1267  | 142   |
| Number of detected SDB events | 1305  | 2213   | 989   | 90    |
| Sensitivity                   | 0.738 | 0.804  | 0.781 | 0.634 |

*Note: SDB events having overlapped periods with different body positions are not included to avoid confusion.*
